# Supplementary material for: o-Vanillin Modulates Cell Phenotype and Extracellular Vesicles of Human Mesenchymal Stem Cells and Intervertebral Disc Cells
Source: MDPI journal article supplement (doi:10.3390/cells11223589), 2022-11-13
Supplement: s1 [file s1]

## Supplementary figures

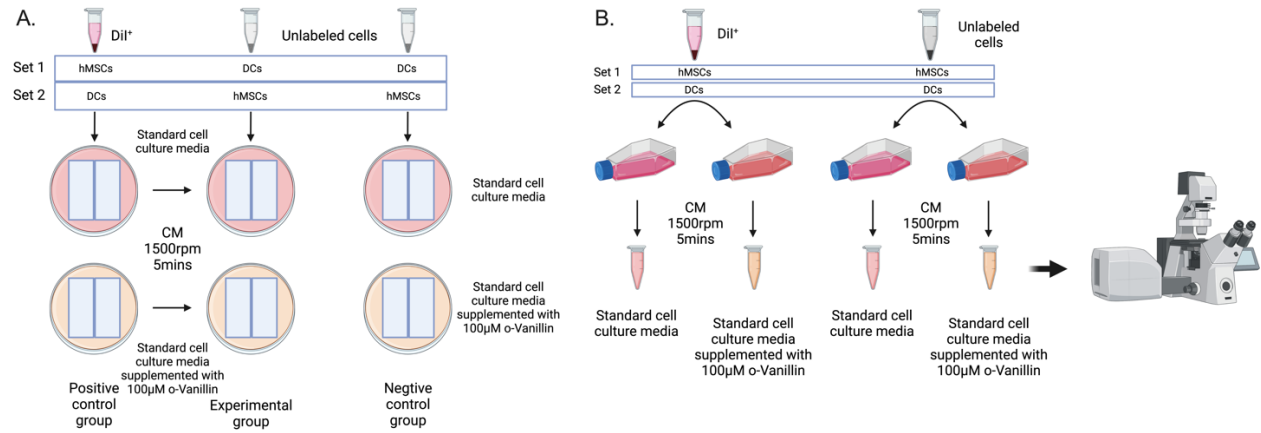

**Figure S1.** Schematic representation of the experimental design.

**(A)** EV production and uptake.

**(B)** The structure and size detection of EVs.

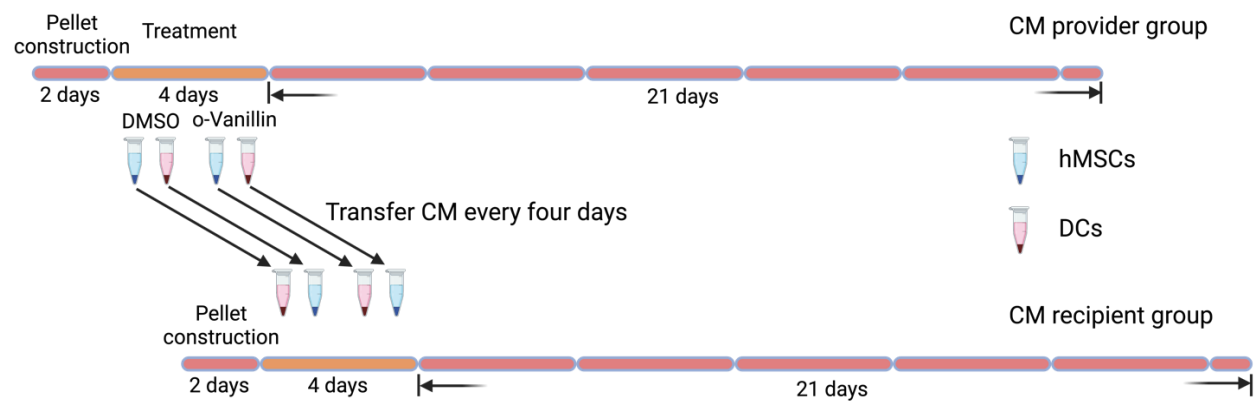

**Figure S2.** qPCR sample setup.

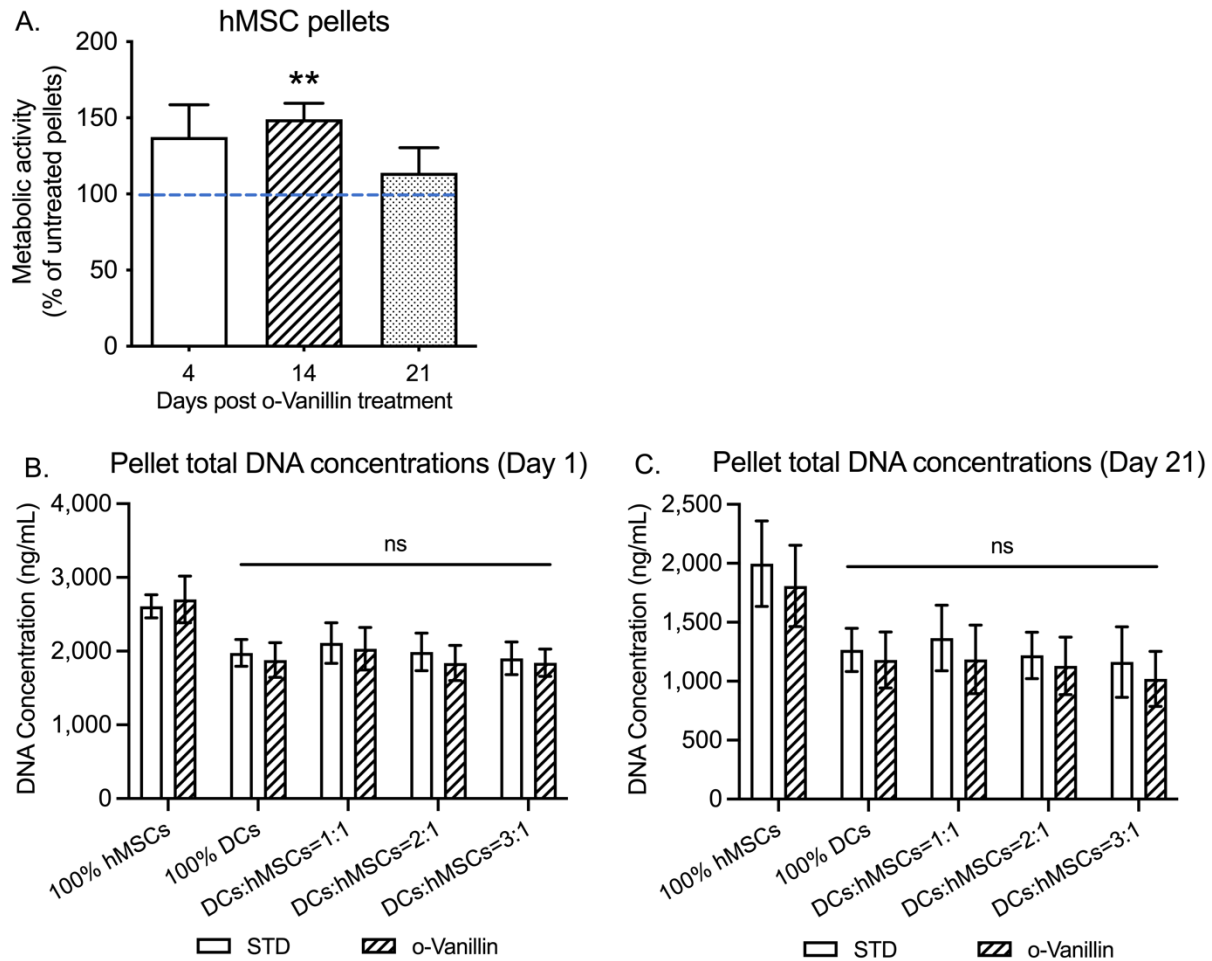

**Figure S3.** Metabolic activity of hMSC pellets and the cell loss and proliferation in untreated and o-Vanillin-treated pellets in the start and end of the 21-day culture. Related to **Figure 1**.

**(A)** Metabolic activities of hMSCs in day 4, 14, and 21 post treatment of o-Vanillin. Data is normalized to untreated hMSC pellets.  $n = 3$ .

**(B and C)** Quantification of total DNA concentrations in 100% hMSCs, 100% DCs, and co-cultures (1:1, 2:1, and 3:1 (DCs:hMSCs)) in Day 1 **(B)** and Day 21 **(C)**.  $n = 5$ .

Values are presented as mean  $\pm$  SEM. \*\* indicates a statistically significant change assessed by a paired  $t$ -test:  $p < 0.01$ .



**Figure S4.** EVs in complete cell culture media and from unlabeled hMSCs and DCs in the respective CM. Related to **Figure 3**.

**A (a-c).** Representative images showing EVs in cell culture media from FBS. No red signal was detected in the regular complete cell culture media (**A (a)**). A small quantity of bovine EVs from FBS was observed in the bright field (**A (b-c)**). **A (d-i).** Representative images showing the EV structures generated by unlabeled hMSCs (**d-f**) and DCs (**g-i**). No red signal was detected in the unlabeled hMSC CM (**A (d)**) and DC CM (**A (g)**). The EVs from hMSCs (**A (e-f)**) and DCs (**A (h-i)**) were observed in the bright field. **A (j-l).** Representative images showing EVs from FBS in cell culture media stained by Dil. The bovine serum EVs presented weak red signal when exposed to Dil in CM (**A (j and l)**). EV diameters were measured (**b, e, h, and k**). Scale bars: 10  $\mu\text{m}$ .  $n = 3$ .

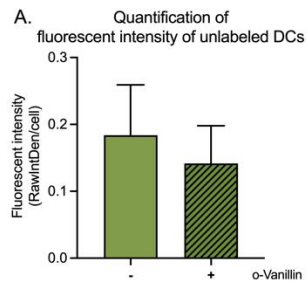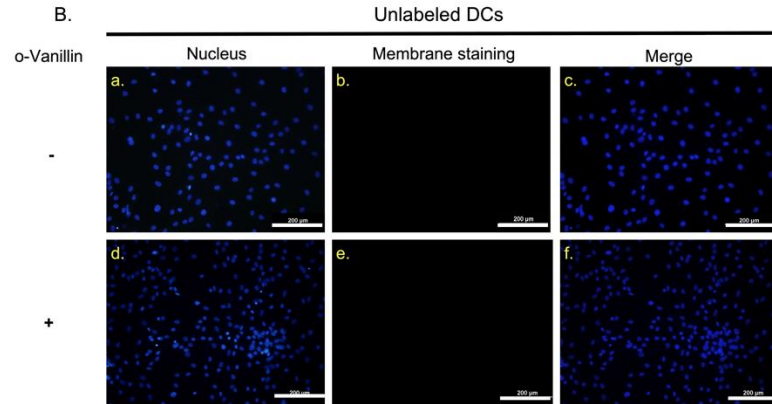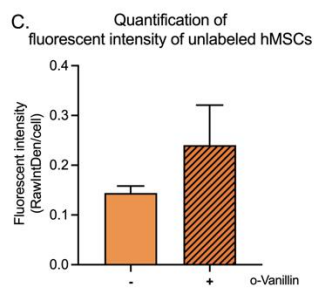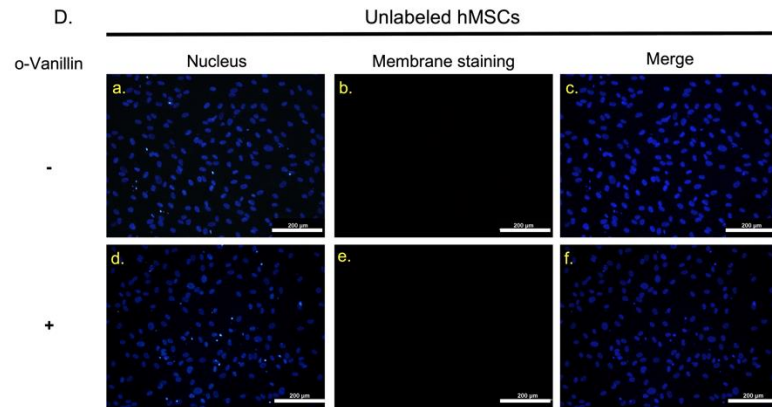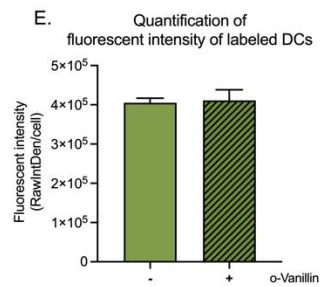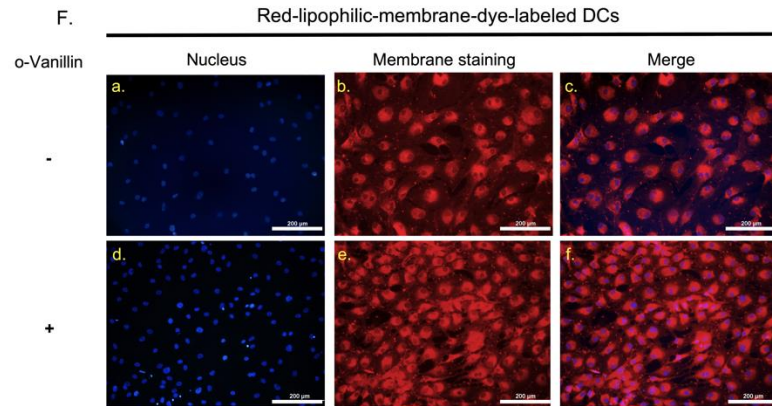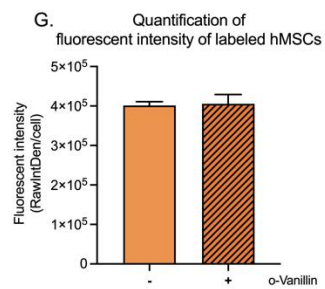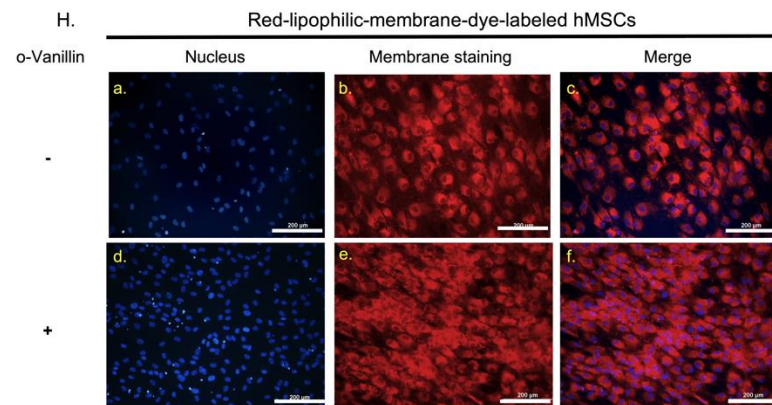

**Figure S5.** Unlabeled and labeled DC and hMSC control samples. Related to **Figure 4**.

**(A)** Quantification of cellular fluorescent intensities of unlabeled DCs cultured in standard pellet culture media with and without o-Vanillin treatment.  $n = 3$ .

**(B)** Representative images of unlabeled DCs cultured in standard pellet culture media without **(a-c)** and with **(d-f)** o-Vanillin treatment. Scale bars: 200  $\mu\text{m}$ .  $n = 3$ .

**(C)** Quantification of cellular fluorescent intensities of unlabeled hMSCs cultured in standard pellet culture media with and without o-Vanillin treatment.  $n = 3$ .

**(D)** Representative images of unlabeled hMSCs cultured in standard pellet culture media without **(a-c)** and with **(d-f)** o-Vanillin treatment. Scale bars: 200  $\mu\text{m}$ .  $n = 3$ .

**(E)** Quantification of cellular fluorescent intensities of labeled DCs cultured in standard pellet culture media with and without o-Vanillin treatment.  $n = 3$ .

**(F)** Representative images of labeled DCs cultured in standard pellet culture media without **(a-c)** and with **(d-f)** o-Vanillin treatment. Scale bars: 200  $\mu\text{m}$ .  $n = 3$ .

**(G)** Quantification of cellular fluorescent intensities of labeled hMSCs cultured in standard pellet culture media with and without o-Vanillin treatment.  $n = 3$ .

**(H)** Photomicrographs of labeled hMSCs cultured in standard pellet culture media without **(a-c)** and with **(d-f)** o-Vanillin treatment. Scale bars: 200  $\mu\text{m}$ .  $n = 3$ .

Representative images showing nuclear (blue), plasma membrane (red), and merge channels of unlabeled and labeled DCs and hMSCs. Patterned histograms represent o-Vanillin-treated groups. Values are presented as mean  $\pm$  SEM. A paired  $t$ -test was conducted in **(A)**, **(C)**, **(E)**, and **(G)**. A statistically significant change was set as  $p < 0.05$ . There was no statistically significant change in **(A)**, **(C)**, **(E)**, and **(G)**.

## Supplementary materials and methods

### Metabolic activity

o-Vanillin's effect on hMSCs in pellet cultures was evaluated via metabolic activity using alamarBlue® Assay [1]. The assessments were performed at three time points: day 4, 14 and 21. As reported previously, no cytotoxic effect was observed for o-Vanillin at 100 µM on DCs [1]. For hMSCs, pellets were constructed for two days and then exposed to 100 µM o-Vanillin or vehicle 0.01% (v/v) DMSO for four days followed by an incubation in standard pellet culture media. In each assessment, 10% (v/v) alamarBlue® reagent (ThermoFisher Scientific, USA) was added to each sample and incubated for 6 hours at 37°C and 5% CO<sub>2</sub>. Fluorescence was measured at excitation 560 nm and emission 590 nm using a TECAN Infinite M200 PRO plate reader with i-control 1.9 Magellan software (TECAN, Switzerland). Related to **Figure 1**.

### Total DNA quantification

DNA quantification was assessed by a Hoechst Assay (Hoechst 33258, ThermoFisher Scientific, Toronto, ON, Canada) as described previously [2]. Samples were analyzed using a TECAN Infinite M200 PRO plate reader with i-control 1.9 Magellan software (TECAN, Männedorf, Switzerland). Related to **Figure 1**.

### Supplementary references

1. Cherif, H.; Bisson, D.G.; Jarzem, P.; Weber, M.; Ouellet, J.A.; Haglund, L. Curcumin and o-Vanillin Exhibit Evidence of Senolytic Activity in Human IVD Cells In Vitro. *Journal of clinical medicine* **2019**, *8*, 433. doi:10.3390/jcm8040433.
2. Fairag, R.; Rosenzweig, D.H.; Ramirez-Garcialuna, J.L.; Weber, M.H.; Haglund, L. Three-Dimensional Printed Polylactic Acid Scaffolds Promote Bone-like Matrix Deposition in Vitro. *ACS applied materials & interfaces* **2019**, *11*, 15306-15315, doi:10.1021/acsami.9b02502.
